# Supplementary material for: Intraspecific and heteroplasmic variations, gene losses and inversions in the chloroplast genome of Astragalus membranaceus
Source: PubMed Central journal article supplement (PMC4761949; doi:10.1038/srep21669), 2016-02-22
Supplement: srep21669-s1.pdf [file srep21669-s1.pdf]

---

## Supplementary Information

Intraspecific and heteroplasmic variations, gene losses and inversions in the chloroplast genome of *Astragalus membranaceus*

Wanjun Lei<sup>1</sup>, Dapeng Ni<sup>3</sup>, Yujun Wang<sup>1</sup>, Junjie Shao<sup>2</sup>, Xincun Wang<sup>2</sup>, Dan Yang<sup>2</sup>, Jinsheng Wang<sup>1§</sup>, Haimei Chen<sup>2§</sup>, Chang Liu<sup>2§</sup>

§Corresponding authors: Chang Liu [cliu6688@yahoo.com](mailto:cliu6688@yahoo.com), 0086-10-57833111; Haimei Chen, [hmchen@implad.ac.cn](mailto:hmchen@implad.ac.cn), 0086-10-57833114; Jinsheng Wang, [sxndwjs@163.com](mailto:sxndwjs@163.com), 0086-035- 46289318

<sup>1</sup>College of Life Science, Shanxi Agricultural University, Shanxi, P.R. China

<sup>2</sup>Institute of Medicinal Plant Development, Chinese Academy of Medical Sciences, Peking Union Medical College, Beijing, P.R. China.

<sup>3</sup>Research Center of Medicinal Plants, Shandong Academy of Agricultural Sciences, Shandong, P.R. China

WJL: [wjleileo@163.com](mailto:wjleileo@163.com)

DPN: [ndp007@163.com](mailto:ndp007@163.com)

YJW: [wangyujun854190@126.com](mailto:wangyujun854190@126.com)

JJS: [shaojie415@126.com](mailto:shaojie415@126.com)

XCW: [w822c716@163.com](mailto:w822c716@163.com)

DY: [dyang@implad.ac.cn](mailto:dyang@implad.ac.cn)

JSW: [sxndwjs@163.com](mailto:sxndwjs@163.com)

HMC: [hmchen@implad.ac.cn](mailto:hmchen@implad.ac.cn)

CL: [cliu@implad.ac.cn](mailto:cliu@implad.ac.cn)

Table S1 Length of introns and exons of the split genes.

| Gene Name           | Gene Location |        |        | Length (bp) |          |         |           |
|---------------------|---------------|--------|--------|-------------|----------|---------|-----------|
|                     | Strand        | Start  | End    | Exon I      | Intron I | Exon II | Intron II |
| <i>ycf3</i>         | +             | 16648  | 18586  | 117         | 706      | 228     | 735       |
| <i>rpoC1</i>        | +             | 37350  | 40117  | 432         | 713      | 1623    |           |
| <i>atpF</i>         | +             | 47921  | 49176  | 168         | 677      | 411     |           |
| <i>clpP</i>         | -             | 67413  | 68617  | 363         | 615      | 227     |           |
| <i>petB</i>         | +             | 71631  | 73101  | 6           | 823      | 642     |           |
| <i>petD</i>         | +             | 73307  | 74510  | 8           | 712      | 484     |           |
| <i>rpl16</i>        | -             | 78346  | 79749  | 9           | 984      | 411     |           |
| <i>rpl2</i>         | -             | 81189  | 82728  | 393         | 712      | 435     |           |
| <i>ndhB</i>         | -             | 90709  | 92882  | 723         | 689      | 762     |           |
| <i>ndhA</i>         | -             | 111824 | 114151 | 552         | 1236     | 540     |           |
| <i>rps12-5' end</i> | -             | 67138  | 67251  | 114         | -        | -       |           |
| <i>rps12-3' end</i> | -             | 93682  | 93939  | -           | -        | 258     |           |
| <i>trnK-UUU</i>     | -             | 1739   | 4304   | 38          | 2494     | 36      |           |
| <i>trnC-ACA</i>     | -             | 9788   | 10473  | 41          | 589      | 58      |           |
| <i>trnL-UAA</i>     | +             | 13491  | 14118  | 36          | 543      | 51      |           |
| <i>trnT-CGU</i>     | -             | 51154  | 51931  | 36          | 700      | 44      |           |
| <i>trnE-UUC</i>     | +             | 97703  | 98552  | 33          | 778      | 41      |           |
| <i>trnA-UGC</i>     | +             | 98622  | 99495  | 38          | 783      | 55      |           |

Table S2 Codon usage and codon-anticodon recognition patterns in *A. membranaceus* chloroplast genome.

| Codon | Amino acid | Number | tRNA                               | Codon | Amino acid | Number | tRNA            | Codon | Amino acid | Number | tRNA            |
|-------|------------|--------|------------------------------------|-------|------------|--------|-----------------|-------|------------|--------|-----------------|
| GCA   | A          | 351    | <i>trnA-UGC</i>                    | AAG   | K          | 263    |                 | AGC   | S          | 83     | <i>trnS-GCU</i> |
| GCC   | A          | 173    |                                    | CTA   | L          | 310    | <i>trnL-UAG</i> | AGT   | S          | 361    |                 |
| GCG   | A          | 120    |                                    | CTC   | L          | 137    |                 | TCA   | S          | 320    | <i>trnS-UGA</i> |
| GCT   | A          | 577    |                                    | CTG   | L          | 122    |                 | TCC   | S          | 234    | <i>trnS-GGA</i> |
| TGC   | C          | 58     | <i>trnC-GCA</i>                    | CTT   | L          | 488    |                 | TCG   | S          | 148    |                 |
| TGT   | C          | 186    | <i>trnC-ACA</i>                    | TTA   | L          | 818    | <i>trnL-UAA</i> | TCT   | S          | 476    |                 |
| GAC   | D          | 160    | <i>trnD-GUC</i>                    | TTG   | L          | 482    | <i>trnL-CAA</i> | ACA   | T          | 357    | <i>trnT-UGU</i> |
| GAT   | D          | 698    |                                    | ATG   | M          | 502    | <i>trnM-CAU</i> | ACC   | T          | 191    | <i>trnT-GGU</i> |
| GAA   | E          | 882    | <i>trnE-UUC</i>                    | AAC   | N          | 251    | <i>trnN-GUU</i> | ACG   | T          | 102    | <i>trnT-CGU</i> |
| GAG   | E          | 256    |                                    | AAT   | N          | 854    |                 | ACT   | T          | 467    |                 |
| TTC   | F          | 378    | <i>trnF-GAA</i>                    | CCA   | P          | 279    |                 | GTA   | V          | 475    |                 |
| TTT   | F          | 923    |                                    | CCC   | P          | 169    |                 | GTC   | V          | 140    | <i>trnV-GAC</i> |
| GGA   | G          | 617    |                                    | CCG   | P          | 99     |                 | GTG   | V          | 156    |                 |
| GGC   | G          | 128    | <i>trnG-GCC</i>                    | CCT   | P          | 346    | <i>trnP-UGG</i> | GTT   | V          | 454    |                 |
| GGG   | G          | 198    |                                    | CAA   | Q          | 615    | <i>trnQ-UUG</i> | TGG   | W          | 372    | <i>trnW-CCA</i> |
| GGT   | G          | 540    |                                    | CAG   | Q          | 163    |                 | TAC   | Y          | 151    | <i>trnY-GUA</i> |
| CAC   | H          | 105    | <i>trnH-GUG</i>                    | AGA   | R          | 369    | <i>trnR-UCU</i> | TAT   | Y          | 683    |                 |
| CAT   | H          | 385    |                                    | AGG   | R          | 128    |                 | TAA   | *          | 43     |                 |
| ATA   | I          | 644    |                                    | CGA   | R          | 289    |                 | TAG   | *          | 15     |                 |
| ATC   | I          | 366    | <i>trnI-CAU</i><br><i>trnM-CAU</i> | CGC   | R          | 92     |                 | TGA   | *          | 18     |                 |
| ATT   | I          | 973    |                                    | CGG   | R          | 83     |                 |       |            |        |                 |
| AAA   | K          | 931    | <i>trnK-UUU</i>                    | CGT   | R          | 276    | <i>trnR-ACG</i> |       |            |        |                 |

Table S3 Numbers of mono- and dinucleotide SSRs identified in the chloroplast genome of *A. membranaceus*.

| Repeat Types | Number of Copies |    |    |   |    |    |    |    |    |    |    |    | Total |
|--------------|------------------|----|----|---|----|----|----|----|----|----|----|----|-------|
|              | 4                | 5  | 6  | 7 | 8  | 9  | 10 | 11 | 12 | 13 | 14 | 15 |       |
| A/T          | -                | -  | -  | - | 53 | 33 | 30 | 11 | 8  | 6  | 6  | 1  | 148   |
| C/G          | -                | -  | -  | - | 1  |    |    |    |    |    |    |    | 1     |
| AC/GT        | 1                |    |    |   |    |    |    |    |    |    |    |    | 1     |
| AG/CT        | 10               | 1  |    |   |    |    |    |    |    |    |    |    | 11    |
| AT/AT        | 49               | 16 | 11 | 1 |    |    |    |    |    |    |    |    | 77    |

Table S4 Distributions of SSRs in the 14 IRLC chloroplast genomes

| Species                 | Number of SSRs |    |    |    |   |   | Total |
|-------------------------|----------------|----|----|----|---|---|-------|
|                         | 1              | 2  | 3  | 4  | 5 | 6 |       |
| <i>M. truncatula</i>    | 190            | 63 | 9  | 14 | 0 | 2 | 278   |
| <i>C. arietinum</i>     | 190            | 62 | 5  | 8  | 0 | 1 | 266   |
| <i>T. subterraneum</i>  | 241            | 63 | 13 | 11 | 0 | 0 | 328   |
| <i>P. sativum</i>       | 145            | 61 | 6  | 2  | 0 | 1 | 215   |
| <i>L. sativus</i>       | 167            | 44 | 2  | 4  | 0 | 2 | 219   |
| <i>T. grandiflorum</i>  | 174            | 64 | 4  | 5  | 2 | 0 | 249   |
| <i>T. aureum</i>        | 174            | 62 | 5  | 8  | 2 | 0 | 251   |
| <i>T. repens</i>        | 204            | 81 | 9  | 9  | 0 | 0 | 303   |
| <i>G. glabra</i>        | 158            | 96 | 7  | 11 | 0 | 0 | 272   |
| <i>T. meduseum</i>      | 243            | 71 | 8  | 11 | 4 | 1 | 338   |
| <i>T. boissieri</i>     | 179            | 59 | 1  | 4  | 4 | 0 | 247   |
| <i>T. glanduliferum</i> | 162            | 66 | 8  | 6  | 3 | 0 | 245   |
| <i>T. strictum</i>      | 156            | 66 | 10 | 11 | 4 | 0 | 247   |
| <i>A. membranaceus</i>  | 149            | 89 | 12 | 11 | 1 | 0 | 262   |

Table S5 List of chloroplast genome sequences used in this study.

| Tribe        | Species Name                                               | Accession | Length<br>(bp) | Protein<br>Number | RNA<br>Number | Created<br>date | Updated<br>date |
|--------------|------------------------------------------------------------|-----------|----------------|-------------------|---------------|-----------------|-----------------|
| Cicereae     | <i>Cicer arietinum</i> / common:chickpea                   | NC_011163 | 125319         | 75                | 33            | 08/26/2008      | 03/26/2010      |
| Dalbergieae  | <i>Arachis hypogaea</i> / common:peanut                    | NC_026676 | 156395         | 81                | 44            | 03/20/2015      | 03/20/2015      |
| Fabeae       | <i>Lathyrus sativus</i>                                    | NC_014063 | 121020         | 74                | 34            | 04/23/2010      | 12/07/2010      |
|              | <i>Pisum sativum</i> / common:pea                          | NC_014057 | 122169         | 74                | 34            | 04/23/2010      | 12/07/2010      |
| Galegeae     | <i>Glycyrrhiza glabra</i>                                  | NC_024038 | 127943         | 76                | 34            | 05/01/2014      | 09/29/2014      |
| Genisteae    | <i>Lupinus albus</i> / common:white lupine                 | NC_026681 | 154140         | 83                | 45            | 03/20/2015      | 03/20/2015      |
|              | <i>Lupinus luteus</i> / common:yellow lupine               | NC_023090 | 151894         | 83                | 45            | 12/20/2013      | 09/17/2014      |
| Indigofereae | <i>Indigofera tinctoria</i>                                | NC_026680 | 158367         | 82                | 45            | 03/20/2015      | 03/20/2015      |
| Loteae       | <i>Lotus japonicus</i> / strain:Accession MG-20            | NC_002694 | 150519         | 82                | 45            | 03/01/2001      | 04/15/2009      |
| Millettieae  | <i>Milletia pinnata</i>                                    | NC_016708 | 152968         | 83                | 45            | 01/27/2012      | 01/22/2013      |
| Phaseoleae   | <i>Apios americana</i>                                     | NC_025909 | 148772         | 82                | 43            | 12/22/2014      | 12/22/2014      |
|              | <i>Glycine canescens</i> voucher CSIRO:G1232               | NC_021647 | 152518         | 82                | 45            | 07/23/2013      | 09/06/2013      |
|              | <i>Glycine cyrtoloba</i> voucher CSIRO:G1267               | NC_021645 | 152381         | 81                | 45            | 07/23/2013      | 09/06/2013      |
|              | <i>Glycine dolichocarpa</i> voucher<br>CSIRO:G1134         | NC_021648 | 152804         | 82                | 45            | 07/23/2013      | 09/06/2013      |
|              | <i>Glycine falcata</i> voucher CSIRO:G1718                 | NC_021649 | 153023         | 82                | 45            | 07/23/2013      | 09/06/2013      |
|              | <i>Glycine max</i> / common:soybean                        | NC_007942 | 152218         | 83                | 45            | 04/07/2006      | 04/15/2009      |
|              | <i>Glycine soja</i>                                        | NC_022868 | 152217         | 83                | 46            | 11/19/2013      | 11/19/2013      |
|              | <i>Glycine stenophita</i> voucher CSIRO:G1974              | NC_021646 | 152618         | 82                | 45            | 07/23/2013      | 09/06/2013      |
|              | <i>Glycine syndetika</i> voucher CSIRO:G1300               | NC_021650 | 152783         | 82                | 45            | 07/23/2013      | 09/06/2013      |
|              | <i>Glycine tomentella</i> voucher CSIRO:G1403<br>/ type:D3 | NC_021636 | 152728         | 82                | 45            | 07/03/2013      | 07/03/2013      |

|            |                                                                                 |           |        |    |    |            |            |
|------------|---------------------------------------------------------------------------------|-----------|--------|----|----|------------|------------|
|            | <i>Pachyrhizus erosus</i>                                                       | NC_026682 | 151947 | 83 | 44 | 03/20/2015 | 03/20/2015 |
|            | <i>Phaseolus vulgaris</i>                                                       | NC_009259 | 150285 | 83 | 44 | 04/03/2007 | 04/15/2009 |
|            | <i>Vigna angularis</i> DNA / common:adzuki bean                                 | NC_021091 | 151683 | 81 | 44 | 05/17/2013 | 05/17/2013 |
|            | <i>Vigna radiata</i>                                                            | NC_013843 | 151271 | 82 | 44 | 02/18/2010 | 07/28/2010 |
|            | <i>Vigna unguiculata</i> / common:cowpea                                        | NC_018051 | 152415 | 84 | 46 | 07/02/2012 | 07/02/2012 |
| Robinieae  | <i>Robinia pseudoacacia</i>                                                     | NC_026684 | 154835 | 80 | 45 | 03/20/2015 | 03/20/2015 |
| Trifolieae | <i>Medicago truncatula</i> / strain:Variety Jema Long A-17; common:barrel medic | NC_003119 | 124033 | 76 | 33 | 08/31/2001 | 04/15/2009 |
|            | <i>Trifolium aureum</i>                                                         | NC_024035 | 126970 | 76 | 34 | 04/30/2014 | 09/29/2014 |
|            | <i>Trifolium boissieri</i>                                                      | NC_025743 | 125740 | 74 | 36 | 01/13/2015 | 01/13/2015 |
|            | <i>Trifolium glanduliferum</i>                                                  | NC_025744 | 126149 | 75 | 35 | 12/03/2014 | 12/03/2014 |
|            | <i>Trifolium grandiflorum</i>                                                   | NC_024034 | 125628 | 75 | 35 | 05/01/2014 | 09/29/2014 |
|            | <i>Trifolium meduseum</i>                                                       | NC_024166 | 142595 | 75 | 34 | 06/09/2014 | 09/30/2014 |
|            | <i>Trifolium repens</i> / common:white clover                                   | NC_024036 | 132120 | 75 | 35 | 04/30/2014 | 09/29/2014 |
|            | <i>Trifolium strictum</i>                                                       | NC_025745 | 125834 | 75 | 36 | 01/29/2015 | 01/29/2015 |
|            | <i>Trifolium subterraneum</i>                                                   | NC_011828 | 144763 | 74 | 33 | 01/06/2009 | 08/06/2014 |
|            | <i>Nicotiana tabacum</i> / common:common tobacco                                | NC_001879 | 155943 | 98 | 45 | 11/18/1986 | 04/15/2009 |
|            | <i>Arabidopsis thaliana</i> / common:thale cress                                | NC_000932 | 154478 | 85 | 44 | 09/15/1999 | 03/26/201  |

---

Table S6 The PCR primers used in this study. The first two letters in each primer's ID represent the names of the adjacent scaffolds, and the gap between the scaffolds was filled by this primer. F and R represent "Forward" and "Reverse," respectively.

---

| Primer ID | Sequence (5'-3')         |
|-----------|--------------------------|
| AB-F      | CCTTAGAGCGGACAGATACC     |
| AB-R      | CTAAGCGGGCTCACATAACA     |
| BC-F      | AAAGGGCAGAGTGAATAGAAATAC |
| BC-R      | AAACCCGTTGCCTTACC        |
| CD-F      | AAGGGCTTATTTGATTC        |
| CD-R      | TATATGAGATTTGTCCCTACT    |
| DE-F      | ACGCAGAGATAAAGAAATAGAGAA |
| DE-R      | TGGATCGGGGACAAACT        |
| EF-F      | TGAAAGGTCCAGTAGAGAT      |
| EF-R      | GGATGCACCCCAATGAA        |
| FG-F      | GATTCTTTCGCTGACCTATGTTGT |
| FG-R      | CTACTTGCTTTTCTTCGGTCCAC  |
| GA-F      | CTATAGATTTACCCGTTGTTGATT |
| GA-R      | CTTATTGATATGACCAGGAAAAA  |

---



Figure S1 Alignment of multiple *accD* protein sequences from *A. membranaceus* (Asme) and other representative legume species: *G. glabra* (Glg), *R. pseudoacacia* (Rops), *A. americana* (Apam), *T. strictum* (Trst), *L. japonicus* (Loja), *T. glanduliferum* (Trgl), *L. luteus* (Lulu) and *I. tinctoria* (Inti).

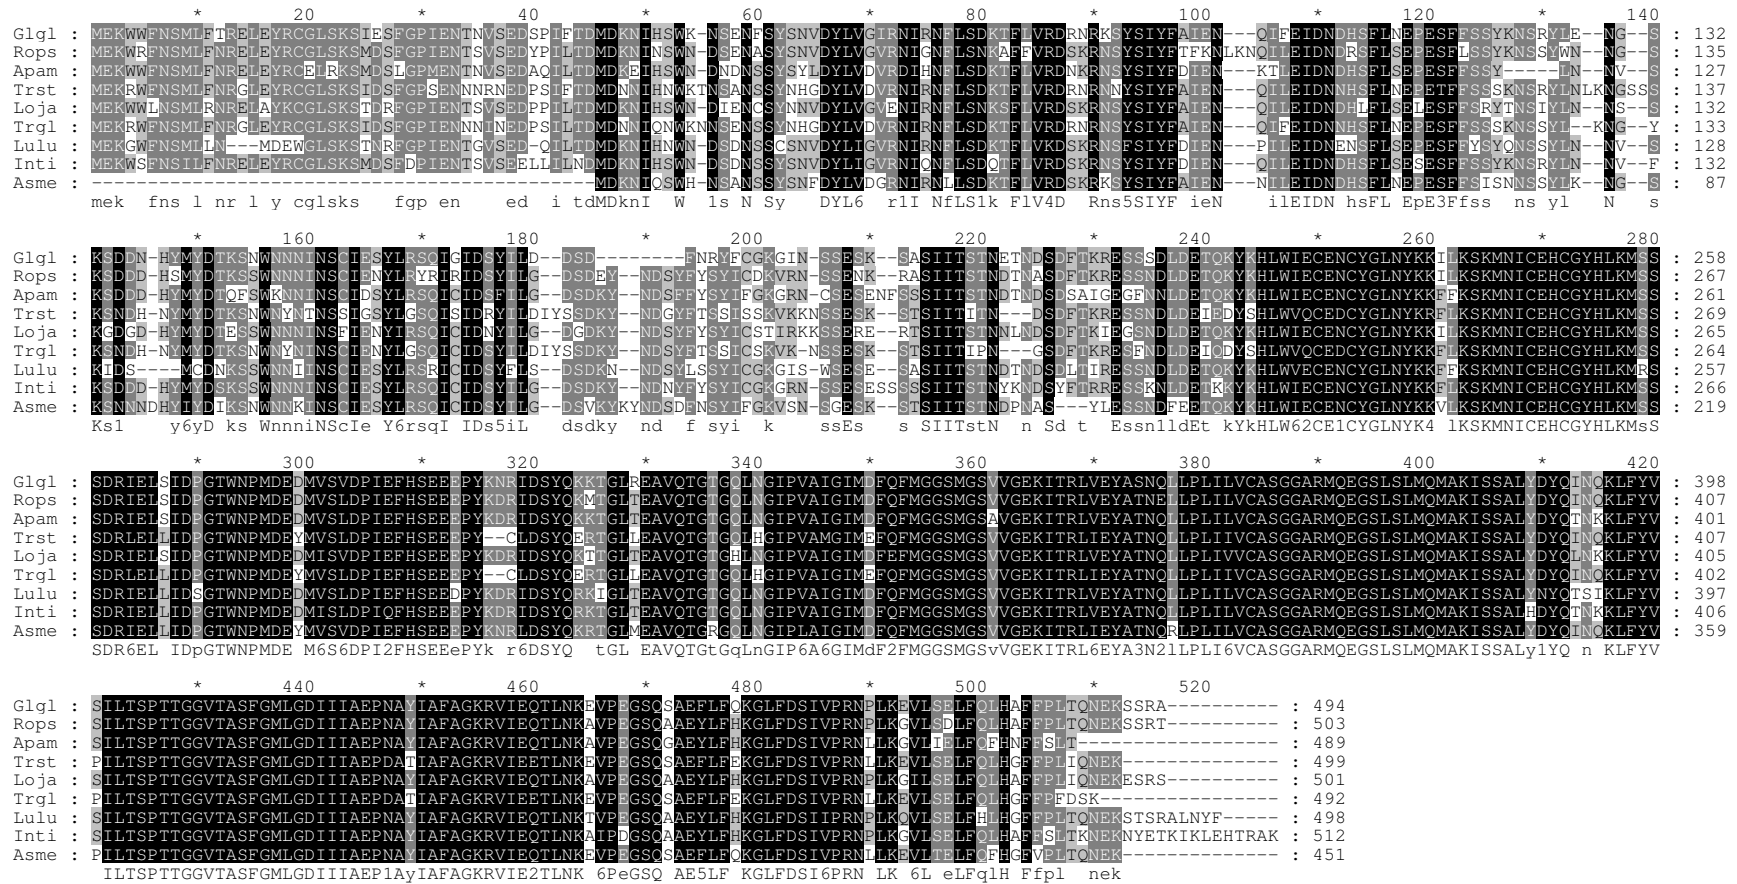

Figure S2 PCR amplification and Sanger sequencing results for the highly polymorphic regions in the *A. membranaceus* genome. Panels A, B, and C shows the three-gap regions between scaffolds, namely, A and B, B and C, and D and E respectively. The left side of each panel shows the agarose gel electrophoresis result, whereas the right side shows the trace files indicating that multiple sequences were obtained from the same PCR bands.

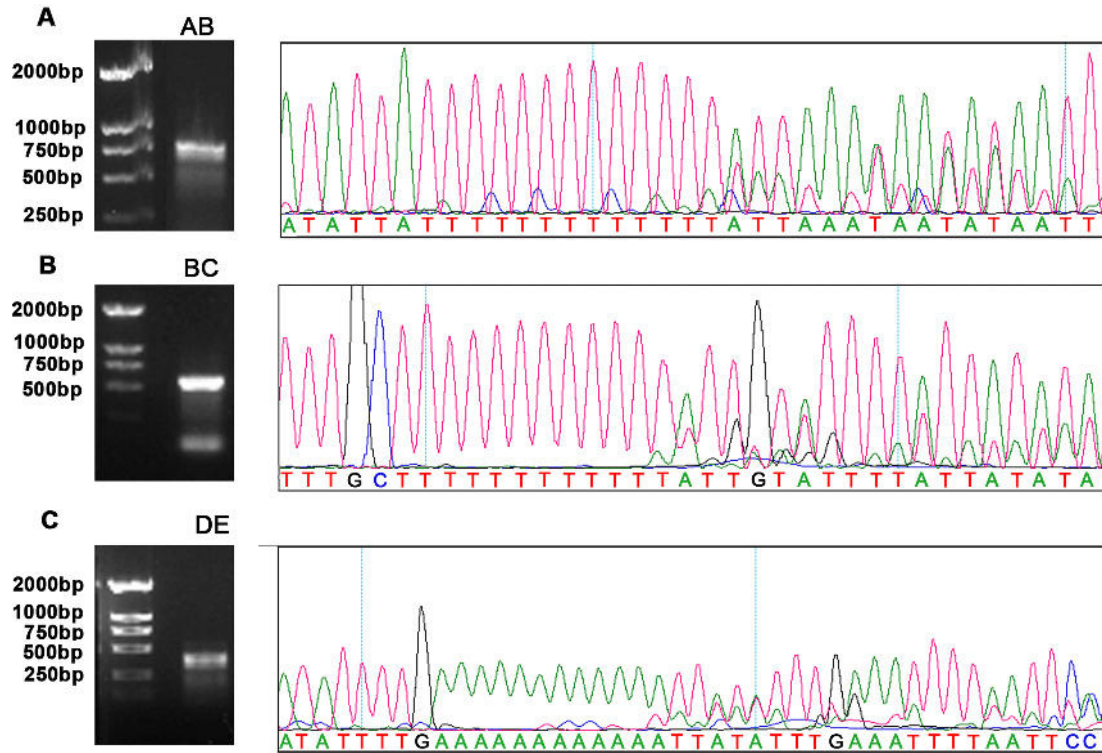

Figure S3 Alignment of the PCR products for the highly polymorphic regions in the *A. membranaceus* genome. All the sequences provided in this file were considered high quality as no overlapping peaks were observed. Panels A, B and C represent the regions AB, BC and DE respectively.

(A) Region AB

```

                *      20      *      40      *      60      *      80      *      100      *
AB      : CCTTAGAGCGGACAGATACCGACCCATCATTCTAATAATAATATAATAACAAAACAAAAGCAAAAATCATTATTAATTTGCAATTCGATAGAAATATCGAATTTTC : 110
AB-i1-c4-F : CCTTAGAGCGGACAGATACCGACCCATCATTCTAATAATAATATAATAACAAAACAAAAGCAAAAATCATTATTAATTTGCAATTCGATAGAAATATCGAATTTTC : 110
AB-i1-c4-R : CCTTAGAGCGGACAGATACCGACCCATCATTCTAATAATAATATAATAACAAAACAAAAGCAAAAATCATTATTAATTTGCAATTCGATAGAAATATCGAATTTTC : 110
AB-i1-c11-F : CCTTAGAGCGGACAGATACCGACCCATCATTCTAATAATAATATAATAACAAAACAAAAGCAAAAATCATTATTAATTTGCAATTCGATAGAAATATCGAATTTTC : 110
AB-i1-c11-R : CCTTAGAGCGGACAGATACCGACCCATCATTCTAATAATAATATAATAACAAAACAAAAGCAAAAATCATTATTAATTTGCAATTCGATAGAAATATCGAATTTTC : 110
AB-i1-c14-F : CCTTAGAGCGGACAGATACCGACCCATCATTCTAATAATAATATAATAACAAAACAAAAGCAAAAATCATTATTAATTTGCAATTCGATAGAAATATCGAATTTTC : 110
AB-i1-c14-R : CCTTAGAGCGGACAGATACCGACCCATCATTCTAATAATAATATAATAACAAAACAAAAGCAAAAATCATTATTAATTTGCAATTCGATAGAAATATCGAATTTTC : 110
AB-i1-c15-F : CCTTAGAGCGGACAGATACCGACCCATCATTCTAATAATAATATAATAACAAAACAAAAGCAAAAATCATTATTAATTTGCAATTCGATAGAAATATCGAATTTTC : 110
AB-i1-c15-R : CCTTAGAGCGGACAGATACCGACCCATCATTCTAATAATAATATAATAACAAAACAAAAGCAAAAATCATTATTAATTTGCAATTCGATAGAAATATCGAATTTTC : 110
AB-i1-c16-F : CCTTAGAGCGGACAGATACCGACCCATCATTCTAATAATAATATAATAACAAAACAAAAGCAAAAATCATTATTAATTTGCAATTCGATAGAAATATCGAATTTTC : 110
AB-i1-c16-R : CCTTAGAGCGGACAGATACCGACCCATCATTCTAATAATAATATAATAACAAAACAAAAGCAAAAATCATTATTAATTTGCAATTCGATAGAAATATCGAATTTTC : 110
AB-i1-c17-F : CCTTAGAGCGGACAGATACCGACCCATCATTCTAATAATAATATAATAACAAAACAAAAGCAAAAATCATTATTAATTTGCAATTCGATAGAAATATCGAATTTTC : 110
AB-i1-c17-R : CCTTAGAGCGGACAGATACCGACCCATCATTCTAATAATAATATAATAACAAAACAAAAGCAAAAATCATTATTAATTTGCAATTCGATAGAAATATCGAATTTTC : 110
AB-i1-c18-F : -CCTTAGAGCGGACAGATACCGACCCATCATTCTAATAATAATATAATAACAAAACAAAAGCAAAAATCATTATTAATTTGCAATTCGATAGAAATATCGAATTTTC : 109
AB-i1-c18-R : -CCTTAGAGCGGACAGATACCGACCCATCATTCTAATAATAATATAATAACAAAACAAAAGCAAAAATCATTATTAATTTGCAATTCGATAGAAATATCGAATTTTC : 109
AB-i1-c19-F : CCTTAGAGCGGACAGATACCGACCCATCATTCTAATAATAATATAATAACAAAACAAAAGCAAAAATCATTATTAATTTGCAATTCGATAGAAATATCGAATTTTC : 110
AB-i1-c19-R : CCTTAGAGCGGACAGATACCGACCCATCATTCTAATAATAATATAATAACAAAACAAAAGCAAAAATCATTATTAATTTGCAATTCGATAGAAATATCGAATTTTC : 110
AB-i5-c1-F : CCTTAGAGCGGACAGATACCGACCCATCATTCTAATAATAATATAATAACAAAACAAAAGCAAAAATCATTATTAATTTGCAATTCGATAGAAATATCGAATTTTC : 110
AB-i5-c1-R : CCTTAGAGCGGACAGATACCGACCCATCATTCTAATAATAATATAATAACAAAACAAAAGCAAAAATCATTATTAATTTGCAATTCGATAGAAATATCGAATTTTC : 110
AB-i5-c2-F : CCTTAGAGCGGACAGATACCGACCCATCATTCTAATAATAATATAATAACAAAACAAAAGCAAAAATCATTATTAATTTGCAATTCGATAGAAATATCGAATTTTC : 110
AB-i5-c2-R : CCTTAGAGCGGACAGATACCGACCCATCATTCTAATAATAATATAATAACAAAACAAAAGCAAAAATCATTATTAATTTGCAATTCGATAGAAATATCGAATTTTC : 110
AB-i5-c6-F : CCTTAGAGCGGACAGATACCGACCCATCATTCTAATAATAATATAATAACAAAACAAAAGCAAAAATCATTATTAATTTGCAATTCGATAGAAATATCGAATTTTC : 110
AB-i5-c6-R : CCTTAGAGCGGACAGATACCGACCCATCATTCTAATAATAATATAATAACAAAACAAAAGCAAAAATCATTATTAATTTGCAATTCGATAGAAATATCGAATTTTC : 110
AB-i5-c7-F : CCTTAGAGCGGACAGATACCGACCCATCATTCTAATAATAATATAATAACAAAACAAAAGCAAAAATCATTATTAATTTGCAATTCGATAGAAATATCGAATTTTC : 110
AB-i5-c7-R : CCTTAGAGCGGACAGATACCGACCCATCATTCTAATAATAATATAATAACAAAACAAAAGCAAAAATCATTATTAATTTGCAATTCGATAGAAATATCGAATTTTC : 110
AB-i5-c11-F : CCTTAGAGCGGACAGATACCGACCCATCATTCTAATAATAATATAATAACAAAACAAAAGCAAAAATCATTATTAATTTGCAATTCGATAGAAATATCGAATTTTC : 110
AB-i5-c11-R : CCTTAGAGCGGACAGATACCGACCCATCATTCTAATAATAATATAATAACAAAACAAAAGCAAAAATCATTATTAATTTGCAATTCGATAGAAATATCGAATTTTC : 110
AB-i5-c12-F : CCTTAGAGCGGACAGATACCGACCCATCATTCTAATAATAATATAATAACAAAACAAAAGCAAAAATCATTATTAATTTGCAATTCGATAGAAATATCGAATTTTC : 110
AB-i5-c12-R : CCTTAGAGCGGACAGATACCGACCCATCATTCTAATAATAATATAATAACAAAACAAAAGCAAAAATCATTATTAATTTGCAATTCGATAGAAATATCGAATTTTC : 110
AB-i5-c13-F : -CCTTAGAGCGGACAGATACCGACCCATCATTCTAATAATAATATAATAACAAAACAAAAGCAAAAATCATTATTAATTTGCAATTCGATAGAAATATCGAATTTTC : 109
AB-i5-c13-R : -CCTTAGAGCGGACAGATACCGACCCATCATTCTAATAATAATATAATAACAAAACAAAAGCAAAAATCATTATTAATTTGCAATTCGATAGAAATATCGAATTTTC : 109
AB-i5-c14-F : CCTTAGAGCGGACAGATACCGACCCATCATTCTAATAATAATATAATAACAAAACAAAAGCAAAAATCATTATTAATTTGCAATTCGATAGAAATATCGAATTTTC : 110
AB-i5-c14-R : CCTTAGAGCGGACAGATACCGACCCATCATTCTAATAATAATATAATAACAAAACAAAAGCAAAAATCATTATTAATTTGCAATTCGATAGAAATATCGAATTTTC : 110
AB-i5-c15-F : CCTTAGAGCGGACAGATACCGACCCATCATTCTAATAATAATATAATAACAAAACAAAAGCAAAAATCATTATTAATTTGCAATTCGATAGAAATATCGAATTTTC : 110
AB-i5-c15-R : CCTTAGAGCGGACAGATACCGACCCATCATTCTAATAATAATATAATAACAAAACAAAAGCAAAAATCATTATTAATTTGCAATTCGATAGAAATATCGAATTTTC : 110

```























---

AB-i5-c2-F : TGAGCCCGCTTAG : 772  
AB-i5-c2-R : TGAGCCCGCTTAG : 772  
AB-i5-c6-F : TGAGCCCGCTTAG : 772  
AB-i5-c6-R : TGAGCCCGCTTAG : 772  
AB-i5-c7-F : TGAGCCCGCTTAG : 771  
AB-i5-c7-R : TGAGCCCGCTTAG : 771  
AB-i5-c11-F : TGAGCCCGCTTAG : 772  
AB-i5-c11-R : TGAGCCCGCTTAG : 772  
AB-i5-c12-F : TGAGCCCGCTTAG : 772  
AB-i5-c12-R : TGAGCCCGCTTAG : 772  
AB-i5-c13-F : TGAGCCCGCTTAG : 771  
AB-i5-c13-R : TGAGCCCGCTTAG : 771  
AB-i5-c14-F : TGAGCCCGCTTAG : 772  
AB-i5-c14-R : TGAGCCCGCTTAG : 772  
AB-i5-c15-F : TGAGCCCGCTTAG : 772  
AB-i5-c15-R : TGAGCCCGCTTAG : 772  
AB-i6-c4-F : TGAGCCCGCTTAG : 772  
AB-i6-c4-R : TGAGCCCGCTTAG : 772  
AB-i6-c7-F : TGAGCCCGCTTAG : 772  
AB-i6-c7-R : TGAGCCCGCTTAG : 772  
AB-i6-c8-F : TGAGCCCGCTTAG : 773  
AB-i6-c8-R : TGAGCCCGCTTAG : 773  
AB-i6-c9-F : TGAGCCCGCTTAG : 772  
AB-i6-c9-R : TGAGCCCGCTTAG : 772  
AB-i6-c11-F : TGAGCCCGCTTAG : 770  
AB-i6-c11-R : TGAGCCCGCTTAG : 770  
AB-i6-c12-F : TGAGCCCGCTTAG : 772  
AB-i6-c12-R : TGAGCCCGCTTAG : 772  
AB-i6-c17-F : TGAGCCCGCTTAG : 772  
AB-i6-c17-R : TGAGCCCGCTTAG : 772  
AB-i7-c11-F : TGAGCCCGCTTAG : 782  
AB-i7-c11-R : TGAGCCCGCTTAG : 782  
AB-i7-c12-F : TGAGCCCGCTTAG : 782  
AB-i7-c12-R : TGAGCCCGCTTAG : 782  
AB-i7-c13-F : TGAGCCCGCTTAG : 772  
AB-i7-c13-R : TGAGCCCGCTTAG : 772  
AB-i7-c14-F : TGAGCCCGCTTAG : 782  
AB-i7-c14-R : TGAGCCCGCTTAG : 782  
AB-i7-c16-F : TGAGCCCGCTTAG : 781  
AB-i7-c16-R : TGAGCCCGCTTAG : 781  
AB-i7-c18-F : TGAGCCCGCTTAG : 771  
AB-i7-c18-R : TGAGCCCGCTTAG : 771  
AB-i7-c19-F : TGAGCCCGCTTAG : 781  
AB-i7-c19-R : TGAGCCCGCTTAG : 781  
AB-i7-c20-F : TGAGCCCGCTTAG : 782  
AB-i7-c20-R : TGAGCCCGCTTAG : 782

---

tGAGCCCGCTAg
